# Supplementary material
Source: publisher figshare collection journal article supplement (https://acs.figshare.com/ndownloader/files/9599200)
Supplement: Supplementary file 1 [file 9599200]

## Supporting Information

### Radical-Pair Based Magnetoreception Amplified by Radical Scavenging: Resilience to Spin Relaxation

Daniel R. Kattnig\*

Living Systems Institute and Department of Physics, University of Exeter, Stocker Road, Exeter, Devon, EX4 4QD, U.K.

\* Author for correspondence: [d.r.kattnig@exeter.ac.uk](mailto:d.r.kattnig@exeter.ac.uk)

- Table S1:** Hyperfine parameters.
- Figure S1:** Absolute reaction anisotropy,  $\Delta_s$ , as a function of  $k_c$  or  $\gamma$  of model three-radical system subject to radical scavenging and spin relaxation.
- Figure S2:** Overlay of the data from Figure 2a and 2b.
- Figure S3:**  $\Gamma_s (k_c=51.8 \mu s^{-1}) / \Gamma_s (k_c=0)$  as a function of the global spin relaxation rate  $\gamma$ .
- Figure S4:** Dependence of absolute reaction anisotropy on the rate of random-field spin relaxation in chosen parts of model three-radical systems.
- Figure S5:** Anisotropic yields of the signalling state for a model  $[FAD^{\bullet-} W^{\bullet+}]$  radical pair subject to radical scavenging and spin relaxation affecting chosen radicals.
- Figure S6:** Contour plots of  $\Delta_s$  as a function of  $k_c$  and  $\gamma$  for a model  $[FAD^{\bullet-} W^{\bullet+}]$  radical pair with spin relaxation in all or individual radicals.
- Figure S7:** Anisotropic yields of the signalling state for a triplet-born  $[FAD^{\bullet-} Z^{\bullet}]$  radical pair subject to radical scavenging.
- Figure S8:** Anisotropic yields of the signalling state for a triplet-born  $[FADH^{\bullet} Z^{\bullet}]$  radical pair subject to radical scavenging.

**Table S1:** Hyperfine parameters of the model systems used in this study. These hyperfine tensors are identical to those used in reference [1]. See [2] for a detailed description of their derivation.

| <b>FAD<sup>•-</sup></b> |                                                                                                                              |
|-------------------------|------------------------------------------------------------------------------------------------------------------------------|
| <b>N5</b>               | $A_{N5} = \begin{pmatrix} -2.77 & 0.11 & 0 \\ 0.11 & -2.47 & 0 \\ 0 & 0 & 49.24 \end{pmatrix} \text{ MHz}$                   |
| <b>N10</b>              | $A_{N10} = \begin{pmatrix} -0.53 & -0.13 & 0 \\ -0.13 & -0.55 & 0 \\ 0 & 0 & 16.94 \end{pmatrix} \text{ MHz}$                |
| <b>H6</b>               | $A_{H6} = \begin{pmatrix} -7.20 & -3.57 & 0 \\ -3.57 & -13.20 & 0 \\ 0 & 0 & -12.15 \end{pmatrix} \text{ MHz}$               |
| <b>3 × H8</b>           | $A_{H8} = \begin{pmatrix} 12.33 & 0 & 0 \\ 0 & 12.33 & 0 \\ 0 & 0 & 12.33 \end{pmatrix} \text{ MHz}$                         |
| <b>2 × Hβ</b>           | $A_{H\beta} = \begin{pmatrix} 11.41 & 0 & 0 \\ 0 & 11.41 & 0 \\ 0 & 0 & 11.41 \end{pmatrix} \text{ MHz}$                     |
| <b>Wc<sup>•+</sup></b>  |                                                                                                                              |
| <b>N1</b>               | $A_{N10} = \begin{pmatrix} -0.94 & 2.59 & -3.79 \\ 2.59 & 9.26 & -14.90 \\ -3.79 & -14.90 & 18.72 \end{pmatrix} \text{ MHz}$ |

1. D. R. Kattnig and P. J. Hore, *Sci. Rep.*, 2017, **7**, 11640.
2. A. A. Lee, J. C. S. Lau, H. J. Hogben, T. Biskup, D. R. Kattnig and P. J. Hore, *J. R. Soc. Interface*, 2014, **11**, 20131063.

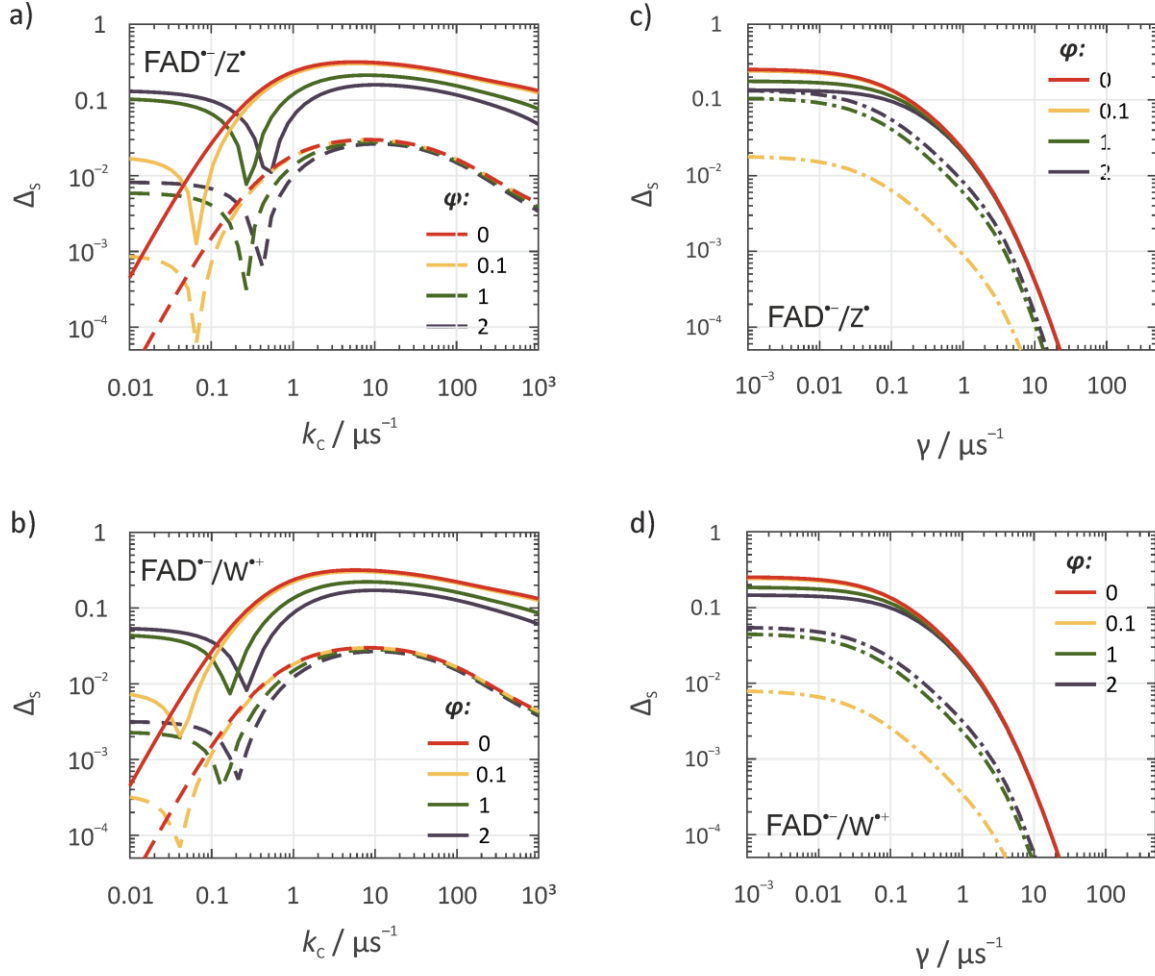

**Figure S1:** Absolute reaction anisotropy as a function of  $k_c$  or  $\gamma$ . Panels *a)* and *b)*: Dependence of  $\Delta_s$  on  $k_c$  in the absence (solid lines) and presence (dashed lines) of spin relaxation with  $\gamma = \gamma_A = \gamma_B = \gamma_C = 1 \mu s^{-1}$  for various  $\phi = k_b/k_f$  as encoded by the different colours and summarized in the common legends. Panels *c)* and *d)*: Dependence of  $\Delta_s$  on  $\gamma = \gamma_A = \gamma_B = \gamma_C$  for  $k_c = 51.8 \mu s^{-1}$  (solid lines) and  $k_c = 0 s^{-1}$  (no scavenging, dashed-dotted lines). All calculations are based on a spin system comprising N5 and N10 of  $FAD^{\bullet-}$  in  $A^{\bullet-}$  and no hyperfine coupled nuclei in  $C^{\bullet}$ . For panels *a)* and *c)* no hyperfine coupled nuclei are present in  $B^{\bullet+}$  ( $FAD^{\bullet-}/Z^{\bullet}$  model); for panels *b)* and *d)* N1 of  $W^{\bullet+}$  has been included ( $FAD^{\bullet-}/W^{\bullet+}$  model). See Figure 2 of the main manuscript for additional details.

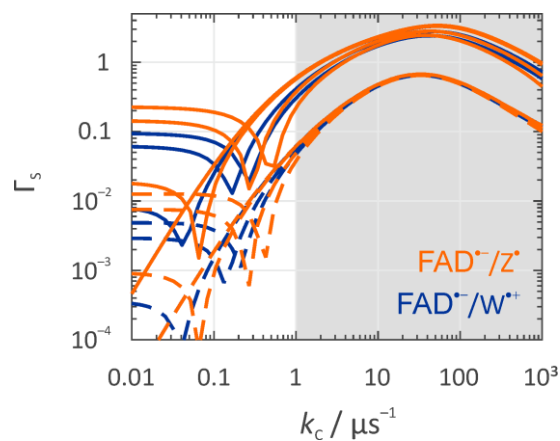

**Figure S2:** Overlay of the data from Figure 2a and 2b. The plot gives the relative anisotropy as a function of  $k_c$  for the  $\text{FAD}^{\bullet-}/\text{Z}^{\bullet}$  (orange lines) and the  $\text{FAD}^{\bullet-}/\text{W}^{\bullet+}$  (blue lines) model in the absence (solid lines) and presence (dashed lines) of relaxation for four different values of  $\varphi$ . Refer to the caption of Figure 2 for details. Under conditions of significant radical scavenging (region shaded in grey) the relative anisotropies are nearly unaffected by the identity of  $\text{B}^{\bullet+}$ .

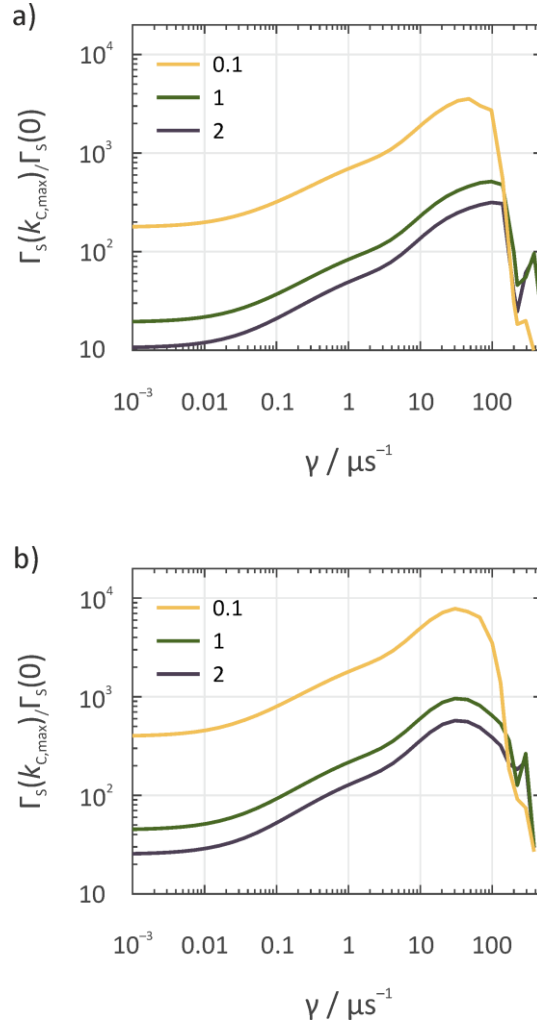

**Figure S3:** Ratio of the relative anisotropy  $\Gamma_s$  of the signalling state in the presences and absence of radical scavenging,  $\Gamma_s(k_c=51.8 \mu s^{-1})/\Gamma_s(k_c=0)$ , as a function of the relaxation rate  $\gamma$  for various  $\varphi = k_b/k_f$  (as encoded by the different colours and summarized in the legend) for a) the  $FAD^{\bullet-}/Z^{\bullet}$  and b) the  $FAD^{\bullet-}/W^{\bullet+}$  model. Random field spin relaxation was present in all radicals:  $\gamma = \gamma_A = \gamma_B = \gamma_C$ .  $B_0 = 50 \mu T$  and  $k_f = 0.1 \mu s^{-1}$ .

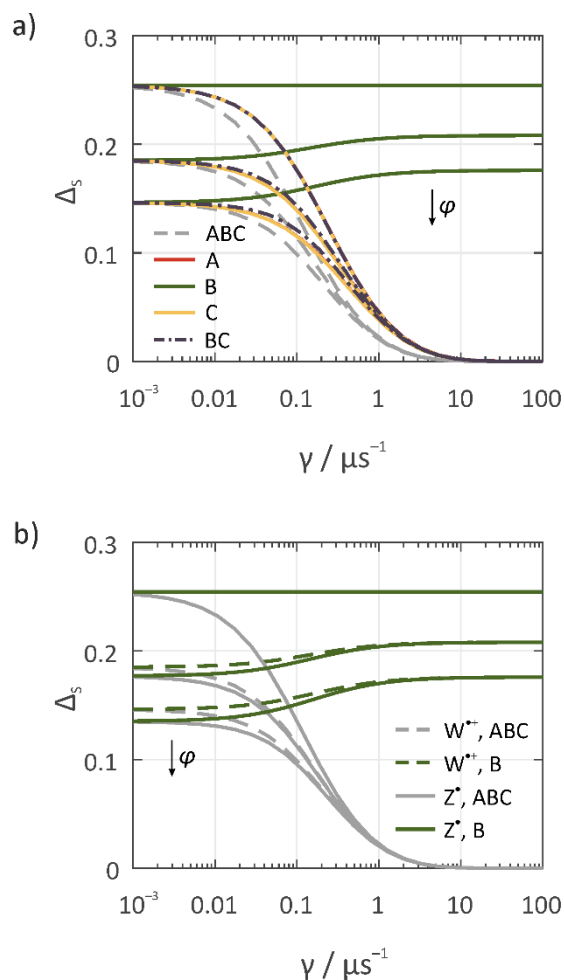

**Figure S4:** Dependence of  $\Delta_s$  on the rate of random-field spin relaxation in chosen parts of the three-radical system for  $\varphi = k_b/k_f = 0, 1$ , and  $2$ . Panel *a*) applies to the scavenged  $\text{FAD}^{\bullet-}/\text{W}^{\bullet+}$  scenario. In panel *b*) the  $\text{FAD}^{\bullet-}/\text{W}^{\bullet+}$  model is compared to the  $\text{FAD}^{\bullet-}/\text{Z}^{\bullet}$  model. The legends name the radicals that are impacted by spin relaxation.  $k_c = 51.8 \mu\text{s}^{-1}$ . Further details are available from the caption of Figure 3 of the main document.

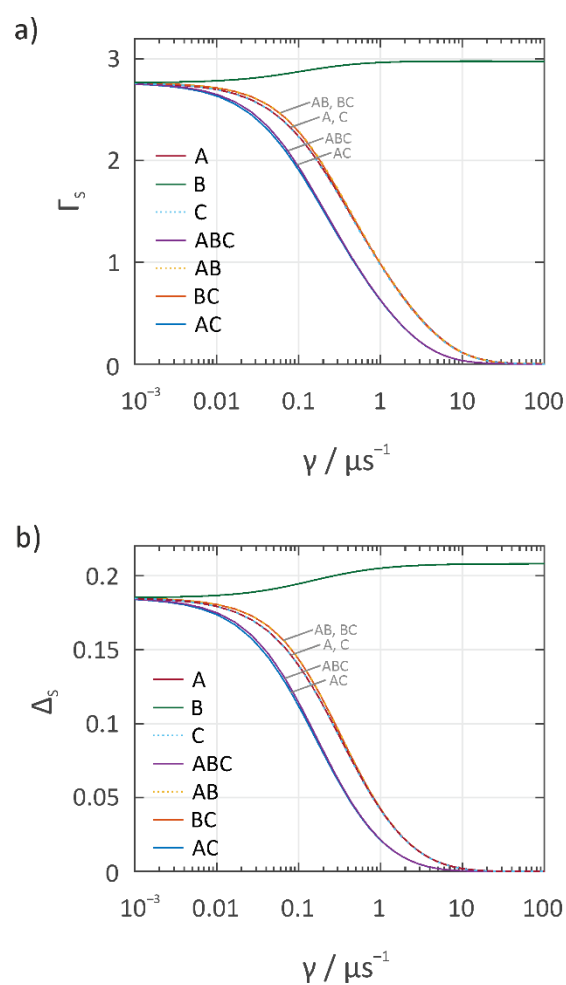

**Figure S5:** Dependence of  $\Gamma_s$  (a) and  $\Delta_s$  (b) on the rate of random-field spin relaxation of the electron spins in various radicals of a model  $[\text{FAD}^{\bullet-} \text{W}^{\bullet+}]$  radical pair subject to radical scavenging. Pertinent parameters:  $\varphi = k_b/k_f = 1$ ;  $B_0 = 50 \mu\text{T}$ ;  $k_f = 0.1 \mu\text{s}^{-1}$ ;  $k_c = 51.79 \mu\text{s}^{-1}$ ;  $\text{A}^{\bullet-}$ ,  $\text{B}^{\bullet+}$  and  $\text{C}^{\bullet}$  comprised N5 and N10 of  $\text{FAD}^{\bullet-}$ , N1 of  $\text{W}_c^{\bullet+}$  and no magnetic nuclei, respectively.

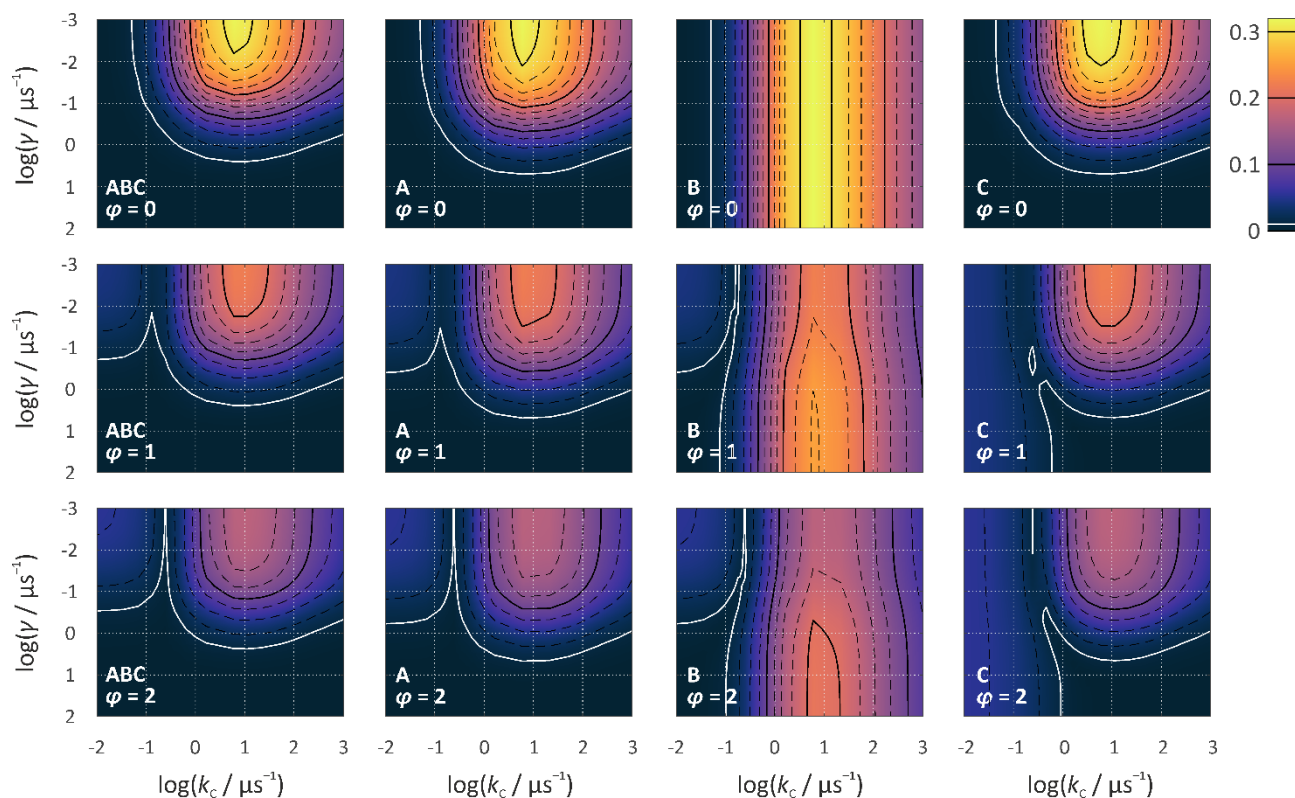

**Figure S6:** Contour plots of  $\Delta_s$  as a function of  $k_c$  and  $\gamma$  for three different  $\varphi = 0, 1$ , and  $2$  (rows) and random field relaxation in all three radicals (left) or either A, B, or C (right). The white and the (up to) three solid black contour lines corresponds to 1 %, 10%, 20% and 30%, respectively. The 1 % contour is used in the main text to discuss the resilience of the compass to spin relaxation. A<sup>•-</sup>, B<sup>•+</sup> and C<sup>•</sup> comprised N5 and N10 of FAD<sup>•-</sup>, N1 of Wc<sup>•+</sup> and no magnetic nuclei, respectively. All simulation parameters were the same as for Figure 2 of the main manuscript.



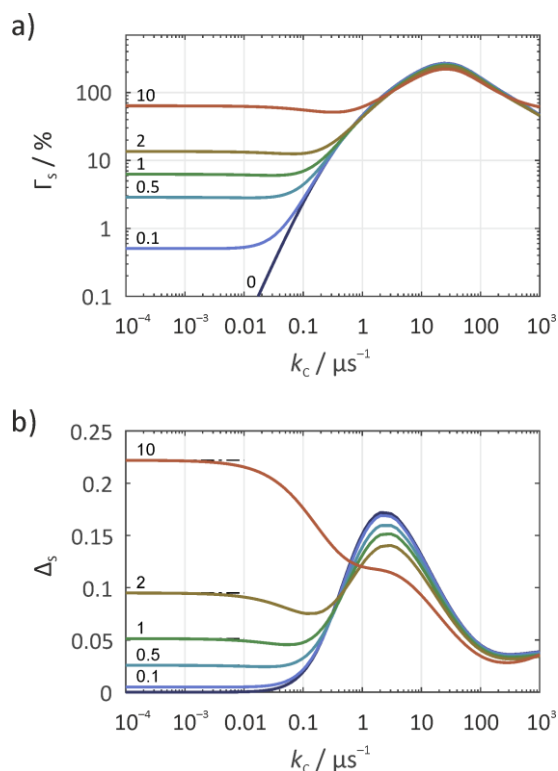

**Figure S7:** Anisotropic yields of the signalling state for a triplet-born  $[\text{FAD}^{\bullet-} \text{Z}^{\bullet}]$  radical pair subject to radical scavenging. *a)* relative anisotropy ( $\Gamma_s$ ), *b)* absolute anisotropy ( $\Delta_s$ ), both as a function of the scavenging rate constant,  $k_c$ , for various values of  $\phi$  (indicated in the figure). The radical triad comprised N5, N10, H6, H8 (3  $\times$ ) and H $\beta$  (2  $\times$ ) in  $\text{FAD}^{\bullet-}$  and no hyperfine interactions in  $\text{Z}^{\bullet}$  or the scavenger. Comparison with calculations for the analogous singlet-born radical pair (see [1]) reveals that for  $\phi = 0$ , the anisotropy of the singlet states is independent of the initial spin multiplicity. Furthermore, for  $\phi = 0$ , the maximal  $\Gamma_s = 2.7$  occurs at  $k_c = 25.4 \mu\text{s}^{-1}$ .

1. D. R. Kattnig and P. J. Hore, *Sci. Rep.*, 2017, **7**, 11640.

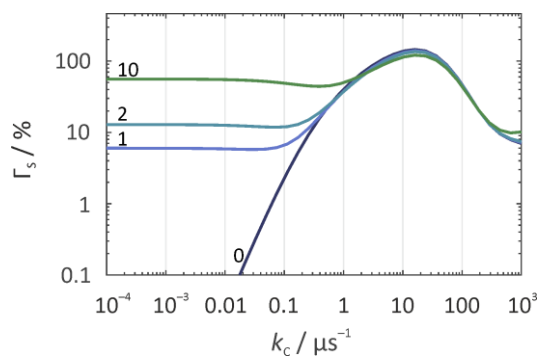

**Figure S8:** Relative anisotropy of the signalling state for a triplet-born  $[\text{FADH}^\bullet \text{Z}^\bullet]$  radical pair subject to radical scavenging.  $\Gamma_s$  is plotted as a function of the scavenging rate constant,  $k_c$ , for various values of  $\phi$  (indicated in the figure). The radical triad comprised N5, N10 and H5 in  $\text{FADH}^\bullet$  and no hyperfine interactions in  $\text{Z}^\bullet$  or the scavenger. Hyperfine parameters have been taken from [2].

2. A. A. Lee, J. C. S. Lau, H. J. Hogben, T. Biskup, D. R. Kattnig and P. J. Hore, *J. R. Soc. Interface*, 2014, **11**, 20131063.
